# Supplementary material
Source: publisher figshare collection journal article supplement (https://acs.figshare.com/ndownloader/files/14367995)
Supplement: Supplementary file 1 [file 14367995]

# Multivalent aminosaccharide-based gold nanoparticles as narrow-spectrum antibiotics *in vivo*

Xinglong Yang<sup>†,\*</sup>, Qin Wei<sup>†</sup>, Huawu Shao<sup>‡,\*</sup>, and Xingyu Jiang<sup>†,§,⊥,\*</sup>

<sup>†</sup> School of Chemistry and Chemical Engineering, University of Jinan, Jinan 250022, China. E-mail: yxl\_5858@126.com

<sup>‡</sup> Natural Products Research Center, Chengdu Institute of Biology, Chinese Academy of Sciences, Chengdu, Sichuan 610041, China; University of Chinese Academy of Sciences, Beijing 100049, China. E-mail: shaohw@cib.ac.cn; Tel: +86-028-82890818

<sup>§</sup> CAS Center for Excellence in Nanoscience, CAS Key Lab for Biological Effects of Nanomaterials and Nanosafety, Beijing Engineering Research Center for BioNanotechnology, National Center for NanoScience and Technology, Beijing 100190, China; University of Chinese Academy of Sciences, Beijing 100049, China. E-mail: xingyujiang@nanoctr.cn; Tel: +86-10-82545558

<sup>⊥</sup> Department of Biomedical Engineering, Southern University of Science and Technology, No 1088, Xueyuan Rd., Xili, Nanshan District, Shenzhen, Guangdong, 518055, China

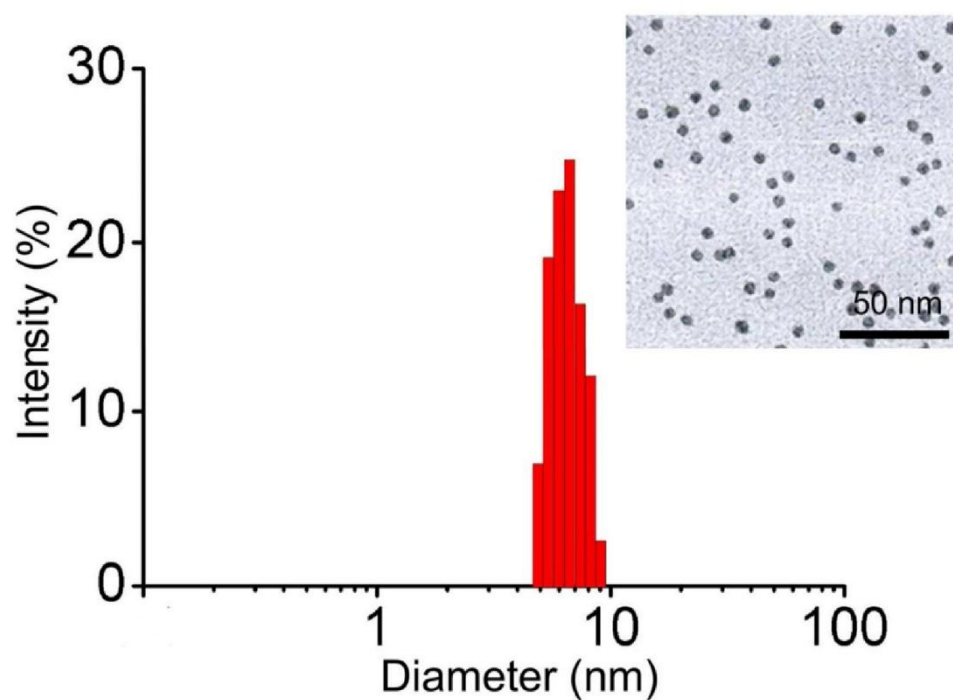

**Fig. S1.** Particle sizes and TEM image of commercial AgNPs.<sup>1</sup>

1. Yang, X.; Yang, J.; Wang, L.; Ran, B.; Jia, Y.; Zhang, L.; Yang, G.; Shao, H.; Jiang, X. Pharmaceutical Intermediate-Modified Gold Nanoparticles: Against Multidrug-Resistant Bacteria and Wound-Healing Application via an Electrospun Scaffold. *ACS Nano* **2017**, *11*, 5737-5745.
